# 1 Rising SARS-CoV-2 Seroprevalence and Patterns of Cross- 2 Variant Antibody Neutralization in UK Domestic Cats

## 3 Authors:

4 Grace B Tyson<sup>1,2\*</sup>, Sarah Jones<sup>1,2</sup>, Nicola Logan<sup>1</sup>, Michael McDonald<sup>2</sup>, Pablo R Murcia<sup>1</sup>, Brian J Willett<sup>1</sup>,  
5 William Weir<sup>2</sup>, Margaret J Hosie<sup>1\*</sup>

## 6 Affiliations:

- 7 1. MRC-University of Glasgow Centre for Virus Research, Glasgow, Scotland
- 8 2. School of Biodiversity, One Health and Veterinary Medicine, University of Glasgow, Glasgow,  
9 Scotland

## 10 \*Corresponding Authors

11 Grace B Tyson (g.tyson.1@research.gla.ac.uk)

12 Margaret J Hosie (margaret.hosie@glasgow.ac.uk)

13

14 **Acknowledgements:** The authors thank Dawn Dunbar<sup>1</sup>, Leigh Marshall<sup>1</sup> and Andrea Bowie<sup>1</sup> for  
15 assisting with sample provision, and the BBSRC and Serth and Gates Charity for funding this research.

16 <sup>1</sup>Veterinary Diagnostic Service, School of Biodiversity, One Health and Veterinary Medicine, University  
17 of Glasgow.

## 18 Abstract

19 Recent evidence confirming cat-to-human SARS-CoV-2 transmission has highlighted the  
20 importance of monitoring infection in domestic cats. Although the effects of SARS-CoV-2 infection on  
21 feline health are poorly characterized, cats have close contact with humans, and with both  
22 domesticated and wild animals. Accordingly, they could act as a reservoir of infection, an

23 intermediate host and a source of novel variants. To investigate the spread of the virus in the cat  
24 population, serum samples were tested for SARS-CoV-2 antibodies by ELISA and a pseudotype-based  
25 virus neutralization assay, designed to detect exposure to variants known to be circulating in the  
26 human population. Overall seroprevalence was 3.2%, peaking at 5.3% in autumn 2021. Variant-  
27 specific neutralizing antibody responses were detected with titers waning over time. The variant-  
28 specific response in the feline population correlated with and trailed the variants circulating in the  
29 human population, indicating multiple ongoing human-to-cat spill-over events.

30

## 31 Introduction

32 Throughout the COVID-19 pandemic, there have been sporadic cases of SARS-CoV-2 infection  
33 detected in felids, particularly in domestic cats (1, 2, 3, 4, 5). SARS-CoV-2 infections in domestic cats  
34 have been reported in the UK (6, 7) and over 20 other countries worldwide, with global spread likely  
35 to be considerably greater. Infections have also been reported in several other felids including snow  
36 leopards, lions, tigers and fishing cats (4, 8). The ACE2 receptor molecule that facilitates SARS-CoV-2  
37 cell entry is well conserved across many mammalian species (9, 10). The amino acid sequence of the  
38 ACE2 protein of *Felis catus*, is highly similar to human ACE2 and this may contribute to the high  
39 susceptibility of felids to SARS-CoV-2 infection (3).

40 Despite current evidence showing most cases of SARS-CoV-2 in felids are spillover infections  
41 resulting from close contact with infected humans (11), SARS-CoV-2-specific antibodies have been  
42 found in stray cats in Rio De Janeiro (12), and in abandoned cats in Wuhan, indicating cats might be  
43 infected from other sources (13). Similarly, cat-to-cat transmission has been demonstrated  
44 experimentally (14, 15, 16).

45 Recently, a case of cat-to-human SARS-CoV-2 transmission was observed in Thailand, which  
46 was indicated by comparing viral genome sequences from the cat and its attending veterinary

47 surgeon (17). Given that domestic cats are frequently in close contact with humans, if they become a  
48 reservoir for the virus, they could initiate new outbreaks or re-introduce SARS-CoV-2 into humans  
49 (18). Moreover, if SARS-CoV-2 adapts to replicate more efficiently in cats, they could contribute to the  
50 emergence of novel variants. It has been suggested that the Omicron variant might have emerged  
51 from a cross-species transmission of SARS-CoV-2 into an animal reservoir, in which mutations  
52 accumulated, then spilled back to humans (19). This pattern of variant emergence was observed  
53 during the 2020 outbreak of SARS-CoV-2 on Dutch mink farms (20). Infection of stray cats living on a  
54 mink farm, suggestive of mink-to-cat transmission, has also been reported (21, 22).

55         Several clinical outcomes of feline SARS-CoV-2 infection have been documented (23), from  
56 asymptomatic infections (24) to mild respiratory signs (25). More severe sequelae include myocarditis  
57 (26, 27), which can be severe and lead to death or necessitate euthanasia. Estimating the frequency  
58 of asymptomatic infections by RT-qPCR is technically challenging as there is a narrow window of  
59 positivity (28). Cui *et al* (2020) suggested cats might be less likely to display signs than humans as two  
60 key sensory components of the inflammasome pathway, Aim2 and NLRP1, are absent in both  
61 domestic cats and tigers (29). It was hypothesized that this might confer an evolutionary advantage of  
62 a reduction in excessive cytokine release, resulting in less host tissue damage and milder  
63 inflammatory symptoms during SARS-CoV-2 infection in these animals.

64         Despite the potential impact of SARS-CoV-2 on feline health, there is currently no official  
65 surveillance program for monitoring SARS-CoV-2 infection or exposure in UK cats. Diagnostic RT-qPCR  
66 testing has primarily been undertaken by researchers and has been constrained by a narrow case  
67 definition by the UK's competent authority(30).

68         It has been demonstrated experimentally that domestic cats mount a neutralizing antibody  
69 response against SARS-CoV-2 that prevents re-infection from a second viral challenge (16) and a feline  
70 IgG response has been detected against both the nucleocapsid and spike proteins via ELISA (31, 32).

71 Cats have also been found to produce a neutralizing antibody response against multiple SARS-CoV-2  
72 variants (33).

73 The antibody response to both SARS-CoV-2 infection and vaccination in humans wanes over  
74 time, more rapidly than for other human coronavirus infections, allowing for re-infection with SARS-  
75 CoV-2 (34, 35). It has also been found that less severe clinical outcomes (36) and longer-lived  
76 immunity is exhibited by children than adults in response to SARS-CoV-2 infection (37). However, it is  
77 unknown if feline SARS-CoV-2 immunity is transient or if age-dependent immune longevity and clinical  
78 outcomes are also a feature of feline infections.

79 In humans, virus neutralizing antibodies generated in response to SARS-CoV-2 vaccines,  
80 currently based on the ancestral Wuhan-Hu-1 strain, are less effective against the Delta and Omicron  
81 variants (38, 39, 40, 41, 42). A cat that has been infected with one variant might resist re-infection  
82 with the same variant but remain susceptible to infection with a different variant, similar to the  
83 phenomenon observed in humans (43).

84 There are many breeds of domesticated cat, and it is possible genetic differences generated  
85 by selective breeding could have an impact on immunity (44), susceptibility to infection or the  
86 severity of clinical signs, whether by selection for a genetic defect or narrowing of major  
87 histocompatibility complex (MHC) diversity. For example, pedigree cats are more likely to develop  
88 feline infectious peritonitis following feline coronavirus infection than non-pedigree cats (45).  
89 However, it should be appreciated that the breeding of pedigree cats is often associated with other  
90 risk factors such as multi-cat households and being kept indoors, and the actual genetic basis for  
91 susceptibility has not been quantified.

92 The aim of the present study was to assess the seroprevalence of SARS-CoV-2 infection in UK  
93 cats during the COVID-19 pandemic, using an ELISA to measure antibodies recognizing the receptor  
94 binding domain of the SARS-CoV-2 S-protein and a pseudotype-based neutralization assay to measure  
95 titers of virus neutralizing antibodies. Neutralizing titers were measured against a panel of HIV (SARS-

96 CoV-2) pseudotypes bearing the S protein of the predominant circulating variants in the UK to  
97 investigate the specificity of the neutralizing response and whether it correlated with the variants  
98 likely to have been circulating at the time of infection.

## 99 Methods

### 100 Samples

101 Residual blood samples for serological testing were obtained from the University of Glasgow  
102 Veterinary Diagnostic Services laboratory (VDS). These samples had been submitted by practicing UK  
103 veterinary surgeons for purposes including routine monitoring, pre-breeding screening, testing for  
104 other infections and the diagnosis of hormonal disorders (Fig 8). Residual serum/plasma that would  
105 otherwise have been discarded after all requested tests had been completed was used for this study.  
106 None of the samples had been submitted because of suspected SARS-CoV-2 infection. These samples  
107 represented a cohort broadly representative of the domestic cat population throughout the UK. Poor  
108 quality samples, for example those displaying marked hemolysis, were excluded. Ethical approval for  
109 the study and was granted by the University of Glasgow Veterinary Ethics Committee (EA27/20).  
110 Samples were given a unique identification number on arrival, and investigators (GT, NL and SJ) were  
111 blinded to sample metadata until the data analysis stage.

112

### 113 Serological testing

114 Samples were initially screened at a final dilution of 1 in 100 using a pseudotype-based virus  
115 neutralization assay (PVNA). PVNA positive samples were confirmed using a double antigen binding  
116 assay (DABA) ELISA that detected antibodies recognizing the receptor-binding domain of the SARS-  
117 CoV-2 S protein. Neutralizing antibody titers were estimated by performing a PVNA with serially  
118 diluted samples.

119 For the neutralization assays, HIV (SARS-CoV-2) pseudotypes were constructed bearing the spike  
120 proteins of either the Wuhan-Hu-1 D614G (B.1), Alpha (B.1.1.7), Delta (B.1.617.2) or Omicron (BA.1)  
121 SARS-CoV-2 variants. Samples collected early in the pandemic were tested against Wuhan-Hu-1  
122 D614G (B.1) only while new variants were included in the assay over time, as each new SARS-CoV-2  
123 variant emerged during subsequent waves of the pandemic.

124

## 125 Pseudotype-based Virus Neutralization Assay

126 The method for this assay has been described previously (40). Briefly, HEK293, HEK293T, and 293-  
127 ACE2 cells were maintained in Dulbecco's modified Eagle's medium (DMEM) supplemented with 10%  
128 fetal bovine serum, 200mM L-glutamine, 100µg/ml streptomycin and 100 IU/ml penicillin. HEK293T  
129 cells were transfected with the appropriate SARS-CoV-2 S gene expression vector (wild type or  
130 variant) in conjunction with p8.91 (46) and pCSFLW (47) using polyethylenimine (PEI, Polysciences,  
131 Warrington, USA). HIV (SARS-CoV-2) pseudotypes were harvested from culture fluids 48 hours post-  
132 transfection, filtered at 0.45µm, aliquoted and frozen at -80°C prior to use. The SARS-CoV-2 spike  
133 glycoprotein expression constructs were synthesized by GenScript (Netherlands). Constructs bore the  
134 following mutations relative to the Wuhan-Hu-1 sequence (GenBank: MN908947):

- 135     ▪ **B.1 (Wuhan-Hu-1 D614G)** – D614G
- 136     ▪ **B.1.1.7 (Alpha)** – Δ69-70, Δ144, N501Y, A570D, D614G, P681H, T716I, S982A, D1118H
- 137     ▪ **B.1.617.2 (Delta)** – T19R, G142D, Δ156-157, R158G, L452R, T478K, D614G, P681R, D950N
- 138     ▪ **B.1.1.529 (Omicron BA.1)** - A67V, Δ69-70, T95I, G142D/Δ143-145, Δ211/L212I, ins214EPE,  
139         G339D, S371L, S373P, S375F, K417N, N440K, G446S, S477N, T478K, E484A, Q493R, G496S,  
140         Q498R, N501Y, Y505H, T547K, D614G, H655Y, N679K, P681H, N764K, D796Y, N856K, Q954H,  
141         N969K, L981F

142 All synthesized S genes were codon-optimized, incorporated the mutation K1255STOP to enhance  
143 surface expression, and were cloned into the pcDNA3.1(+) eukaryotic expression vector. 293-ACE2  
144 target cells (48) were maintained in complete DMEM supplemented with 2µg/ml puromycin.

145 The fixed dilution screen was performed with serum/plasma diluted 1:50 in complete DMEM (in  
146 duplicate) for each pseudotype. Diluted samples were incubated with HIV (SARS-CoV-2) pseudotypes  
147 for 1 hour and plated onto 239-ACE2 target cells. After 48-72 hours, luciferase activity was quantified  
148 by the addition of Steadylite Plus chemiluminescence substrate and analysis on a Perkin Elmer EnSight  
149 multimode plate reader (PerkinElmer, Beaconsfield, UK). Samples which reduced the infectivity of the  
150 pseudotypes by at least 90% were classed as positive. For positive samples, neutralizing activity was  
151 then quantified by serial dilution. Each sample was serially diluted (in triplicate) from 1:50 to 1:36450  
152 in complete DMEM prior to incubation with the respective viral pseudotype. Antibody titer was then  
153 estimated by interpolating the point at which infectivity had been reduced to 90% of the value for the  
154 no serum control samples.

155 Seropositive cats were categorized according to the pseudotype variant against which the highest  
156 neutralizing titer was obtained. For example, samples showing a higher titer against the Delta  
157 pseudotype compared to the other pseudotypes were categorized as “Delta dominant”.

#### 158 Double Antigen Bridging Assay ELISA

159 All samples that appeared positive on the initial fixed dilution PVNA were tested using a species  
160 agnostic double antigen bridging assay (Microimmune SARS-CoV-2 Double Antigen Bridging Assay  
161 (COVT016), Clin-Tech, Guildford, England) according to the manufacturer’s instructions, to determine  
162 whether samples contained antibodies to the B.1 SARS-CoV-2 receptor-binding domain. This was used  
163 to confirm results of the pseudotype-based neutralization assay by confirming low  
164 chemiluminescence readings were caused by high levels of antibody rather than any toxic  
165 contamination of samples killing the cells.

166

167 Data Analysis

168 Duplicate samples were removed while samples from the same animal tested multiple times were  
169 identified and the earliest sample was used to estimate seroprevalence. A small number of animals  
170 had multiple samples submitted to the VDS at different times and, using these samples, longitudinal  
171 titers were tabulated to explore the effect of time on the development of the humoral response to  
172 SARS-CoV-2. Data were analyzed and graphs prepared using GraphPad Prism 9.3.1. and Microsoft  
173 Excel. Distribution of data was assessed using a Shapiro-Wilk Normality test. Sample metadata (age,  
174 sex, breed, location) was acquired from information recorded in the VDS database, which was  
175 supplied by submitting veterinary surgeons. Differences between groups were assessed for  
176 significance in paired data using a Wilcoxon test and in unpaired data using a Mann-Whitney test.  
177 Significance of categorical data was assessed using a Chi-Square test.

178



## 179 Results

### 180 Sample population

181 Serum samples from 2309 different cats sampled between the 21<sup>st</sup> of April 2020 and the 7<sup>th</sup> of  
182 February 2022 were tested (Fig. 1a). Within this sample group, 1174 (50.9%) were male, 853 (36.9%)  
183 were female, while the sex of the cat was not recorded for the remaining 282 (12.2%). The ages of the  
184 cats ranged from <1 to 21 years (mean 5.1 years, median 3 years). Age data were not included on the  
185 submission forms for 350 (15.1%) of animals tested. The group comprised 56% non-pedigree cats  
186 (1300/2309) and 31% pedigree cats (720/2309), with the remainder, 13% (289/2309), being of  
187 unstated breed.

188 The study included samples from 112 of the UK's 126 postcode areas, with an uneven distribution  
189 amongst postcode areas that was unrelated to the local human population density. Overrepresented  
190 areas included Blackpool, Glasgow, Edinburgh and Cambridge (Fig 1b).

191

### 192 Overall seroprevalence

193 Seroprevalence of SARS-CoV-2 antibodies in UK cats increased over time (Fig 1c). Overall, the  
194 seroprevalence during the study period was 3.2% (75/2309, 95% CI = 2.56%-4.05%). The  
195 seroprevalence was highest during the periods Sep-Nov 2021 (35/666, 5.3%, 95% CI = 3.69%-7.23%)  
196 and Dec 2021-Feb 2022 (18/348, 5.2%, 95% CI = 3.09%-8.05%).

197

### 198 Seroprevalence amongst different groups

199 A greater proportion of pedigree cats (31/720, 4.3%, 95% CI = 2.94%-6.06%) than non-pedigree cats  
200 (39/1300, 3%, 95% CI = 2.14%-4.08%) tested seropositive for SARS-CoV-2 (Fig 2a & 2b), with Bengal,  
201 Siamese and British Blue/Shorthair breeds showing the highest seroprevalence, however, the  
202 differences in seroprevalence between different breeds were not significant ( $p=0.07$ ) (Fig 2c). Maine

203 Coon cats were the only breed with over 30 cats sampled that showed a lower seroprevalence than  
204 the population mean. The strength of VNA titers elicited by pedigree and non-pedigree cats were not  
205 found to be significantly different ( $p=0.5$ ) (Fig 2d). A greater proportion of male than female cats in  
206 this study were seropositive, however, this was not significant ( $p=0.5$ ) (Fig 3) and there was no  
207 significant difference between the average highest titer for each sex group ( $p=0.7$ ). There was also no  
208 significant difference in cat age between positive and negative samples ( $p=0.89$ ) (Fig 4), nor any  
209 correlation between age and neutralization titer (Fig 4).

210

211 Antibody titers against pseudotypes of different SARS-CoV-2 variants

212 A comparison of the specificity of the neutralizing response suggested 27/75 (36%) of seropositive  
213 cats in this study displayed responses that were “Delta dominant”, 31/75 (41.3%) were “Alpha  
214 dominant” and 17/75 (22.7%) were “B.1 dominant”. On average, Delta dominant cats displayed  
215 higher neutralization titers (mean: 760) against their dominant pseudotype compared to Alpha (488,  
216  $p=0.06$ ) or B.1 (329,  $p=0.02$ ) dominant cats (Fig 5). Throughout the time-period of sampling in this  
217 study (April 2020-Feb 2022), no Omicron dominant seropositive cats were identified.

218 A greater proportion of pedigree than non-pedigree cats were found to be Delta dominant but this  
219 was not significant ( $p=0.4$ ). Non-pedigree cats showed a more even distribution of cases by variant,  
220 whereas comparatively few pedigree cats were infected with the B.1 variant (Fig 5).

221 There appears to be a correlation between the dominant variant observed in cats and the timeline of  
222 variant emergence into the human population. Detection of new dominant variants in cats trails the  
223 detection of the variant in the humans, however, dominant titers were still detected against extinct  
224 variants long after human cases had subsided (Fig. 6).

225 Distinct patterns of neutralization were observed in that B.1 dominant samples generally had slightly  
226 lower titers against the Alpha pseudotype than against B.1, but significantly lower titers against the

227 Delta pseudotype, and significantly lower still against Omicron. Alpha dominant samples showed  
228 slightly lower B.1 titers than Alpha titers and markedly lower Delta and Omicron titers. Delta  
229 dominant cats showed similar titers against the B.1, Alpha and Omicron pseudotypes, all of which  
230 were markedly lower than their Delta titers (Fig 7).

231 Longitudinal samples

232 Five seropositive cats had samples taken at least 12 days apart. In all five cases, it was observed that  
233 neutralizing titers against SARS-CoV-2 waned over time. Percentage decrease in titer per day was  
234 highly variable across samples, but in the case of three of the cats, was consistent across all variants  
235 (Table 1).

236

## 237 Discussion

238 This study has demonstrated that the seroprevalence of anti-SARS-CoV-2 antibodies in the UK  
239 domestic cat population has increased over time, consistent with results ascertained in a survey of  
240 cats and dogs recently conducted in Canada (49) and the very low seroprevalence observed in the  
241 first and second waves of the pandemic in both Thailand and the UK (7, 50). This may be explained by  
242 the persistence of the humoral response over time with a consequent accumulation in the number of  
243 seropositives in the population. While increased seroprevalence during the later months of the  
244 pandemic may mean the likelihood of human-to-cat transmission is greater for newer variants that  
245 are more readily transmitted between humans (51, 52, 53), this has not been experimentally  
246 investigated.

247 Many samples collected at later timepoints had their highest titer against the ancestral B.1 or  
248 Alpha variants, despite the dominant circulating lineage in humans being either Delta or Omicron at  
249 the time (Fig 6). This may indicate the cats were infected during either the first or second (Alpha)  
250 wave of the pandemic and were not re-exposed during the subsequent Delta (third) or Omicron

251 (fourth) waves, which is logical given the generally low overall seroprevalence. A relationship is  
252 evident between the proportion of seropositives, with respect to dominant variant, detected at  
253 different timepoints and the waves of infection in the UK's human population. The dominant strain  
254 detected in cats appears to trail the emergence of each VOC into the human population, indicating  
255 repeated cross-species jumps between humans and cats and implicating owner-to-pet transmission  
256 as the primary route of infection, consistent with other serosurveys (11, 54, 55, 56).

257 Longitudinal samples were available from five seropositive animals in the study. In four cases,  
258 neutralizing antibody titers waned over time, similar to findings in studies of both infected and  
259 vaccinated humans (34, 57). Although a definitive protective threshold antibody level for SARS-CoV-2  
260 has not yet been established, waning neutralizing antibody levels in humans post-vaccination has  
261 been associated with re-infection and reduced protection against novel variants (35, 58, 59).  
262 Increasingly, mucosal immunity and neutralizing IgA are believed to play important roles in the anti-  
263 SARS-CoV-2 response, due to the virus infecting hosts via the respiratory tract (60, 61). Further  
264 investigation into the feline mucosal immune response against SARS-CoV-2 may paint a clearer  
265 picture of the impact of waning serum neutralizing antibody titers on susceptibility.

266 In the absence of sequence data, the variant to which the animal was exposed can only be  
267 inferred from serology, however, in some cases, the titer against the dominant variant was many  
268 times greater than the next highest titer, providing a strong case for it being the infecting variant.  
269 Three distinct patterns of immunity emerged according to which variant was neutralized most  
270 effectively, similar to previous findings in humans (62). It is likely the breadth and potency of variant-  
271 specific neutralization is influenced primarily by both the antigenicity of the variant, and the viral load  
272 post-infection. The trends observed for cats thought to have been infected with the B.1 variant are  
273 similar to the patterns of neutralization reported previously in humans (40, 41). It was shown that  
274 humans vaccinated with a Wuhan-Hu-1- based vaccine develop lower neutralization titers against the  
275 Delta (63) and Omicron (64) variants than against B.1 or Alpha. The distinct genetic and structural

276 differences in the spike protein of Delta and Omicron could account for these variations in  
277 neutralizing antibody titers (65, 66).

278 As all samples tested in this study were collected prior to March 2022, none showed Omicron  
279 dominant neutralization. This finding was as anticipated since only a small proportion of samples were  
280 collected after the emergence of Omicron in the UK.

281 Although seropositivity indicates a cat has previously been infected with SARS-CoV-2, it is  
282 possible that a higher proportion of cats could have been infected with the virus but never developed  
283 or no longer have detectable neutralizing antibodies. Some human studies have identified small  
284 groups displaying either very low-level antibody responses post-vaccination (67) or no detectable  
285 response at all – many of these cases are thought to be correlated with underlying conditions or  
286 autoimmunity (35).

287 A higher proportion of pedigree cats were seropositive compared to their non-pedigree  
288 counterparts - this finding approached statistical significance. Pedigree cats are more likely to be  
289 indoor-only (68) and may therefore experience more close contact with their owners, meaning they  
290 are more exposed to SARS-CoV-2 if their owners become infected.

291 It should be noted that the sample population examined in this study, while broadly  
292 representative of the UK's feline population, was inherently biased towards clinically sick animals. As  
293 all samples tested were remnants from diagnostic submissions, the majority of the animals would  
294 either have been showing signs of disease, newly rescued or under observation at the time of  
295 sampling (Fig 8). This means certain breeds that might be more susceptible to disease could have  
296 been overrepresented. For example, pedigree cats constitute approximately 10% of the UK feline  
297 population (69) but made up 31% of the samples included in this study, perhaps reflecting a higher  
298 morbidity in pedigree cats or increased willingness of pedigree cat owners to spend money on  
299 diagnostic testing. It is possible that SARS-CoV-2 seroprevalence could be higher in the population

300 sampled, since cats attending veterinary clinics might be more likely to have genetic factors,  
301 immunosuppression or comorbidities which affect susceptibility to infection.

302 Our results demonstrate the importance of widespread testing of cats, to detect SARS-CoV-2  
303 exposure and better understand the morbidity and mortality associated with infection in cats. Testing  
304 oropharyngeal swabs for SARS-CoV-2 RNA by RT-qPCR provides an opportunity to monitor for feline-  
305 specific mutations and transmission events from infected cats, as well as allowing for comparison with  
306 serology to accurately identify the causative variant of infection. Both widespread serological and  
307 qPCR-based testing are vital to address the One Health aspect of SARS-CoV-2 infection (70). Without  
308 further research to determine the importance of cats as a possible SARS-CoV-2 reservoir, a vital piece  
309 of the jigsaw may be missing in the attempt to bring global infections under control.

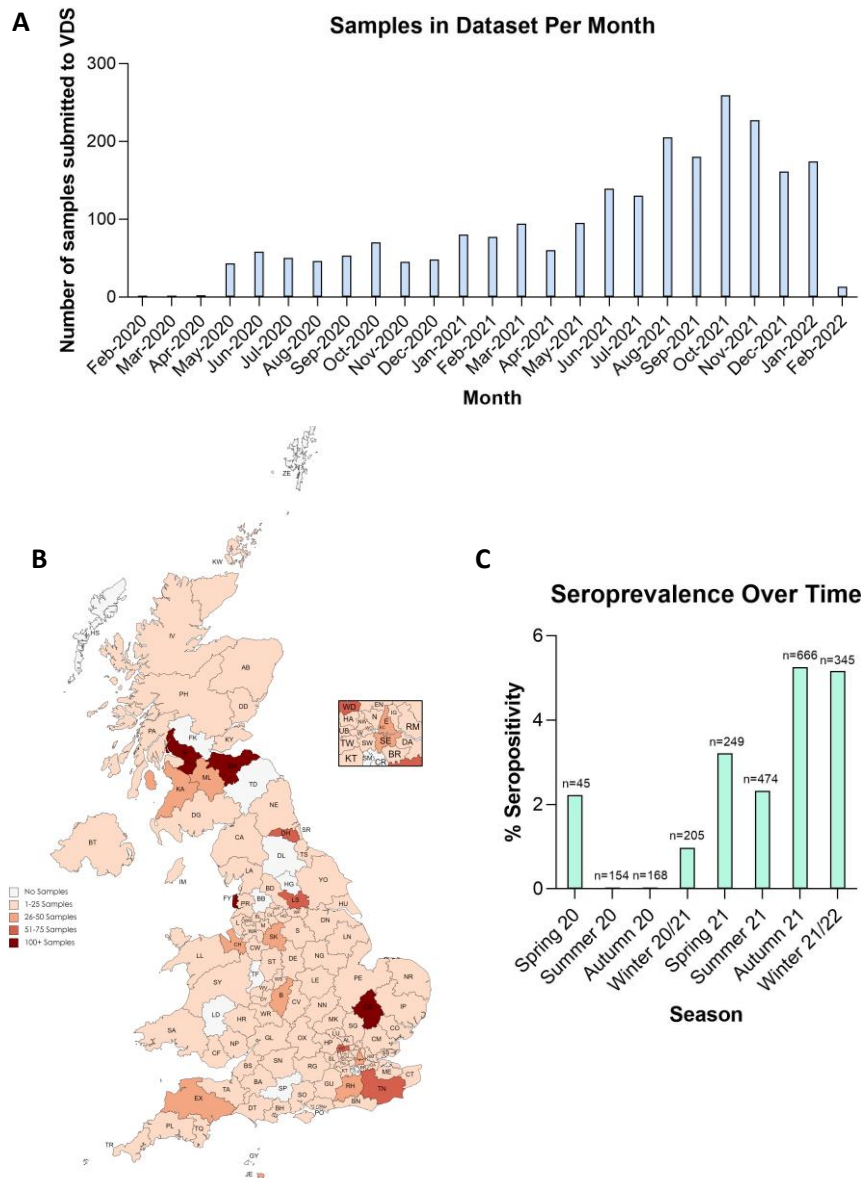

**Figure 1: Overview of Samples included in Analysis.**

The number of samples tested per month (A). The location of the veterinary practices that submitted samples used in this study (B). The percentage seropositivity of samples per 3-month period and sample size for each period. (C). Overall seropositivity across all samples was 3.2% (75/2309).

310

311

312

313

314

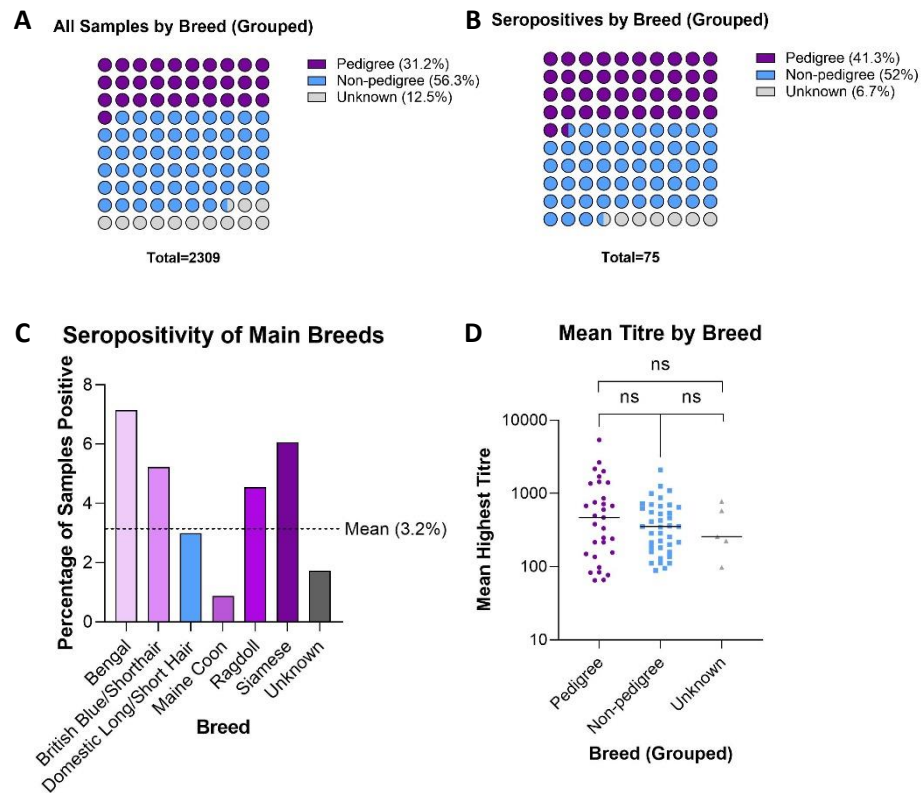

**Figure 2: Total and seropositive samples analysed by breed**

Total samples in this study classified by breed; Pedigree, non-pedigree or unknown (A). Seropositive samples classified by breed (B). The percentage seropositivity for each breed with over 30 samples included in the study (C). The highest virus neutralization titer of each seropositive sample categorized by breed (D). There was no significant difference between the highest titres of each breed category.



315

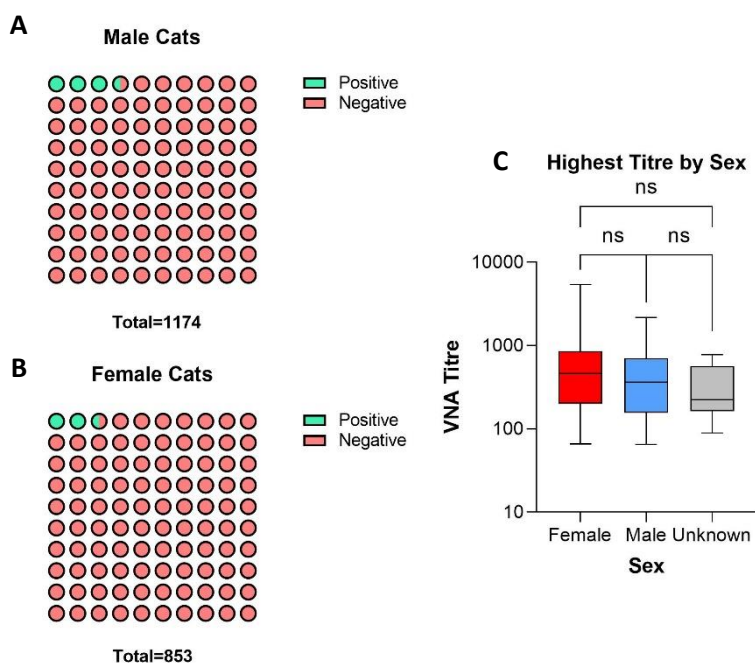

*Figure 3: Overview of sex of seropositive animals*

Total samples tested categorized by sex (A,B). The highest titer of animals in each sex category was not significantly different (Mann-Whitney test) (C).

316

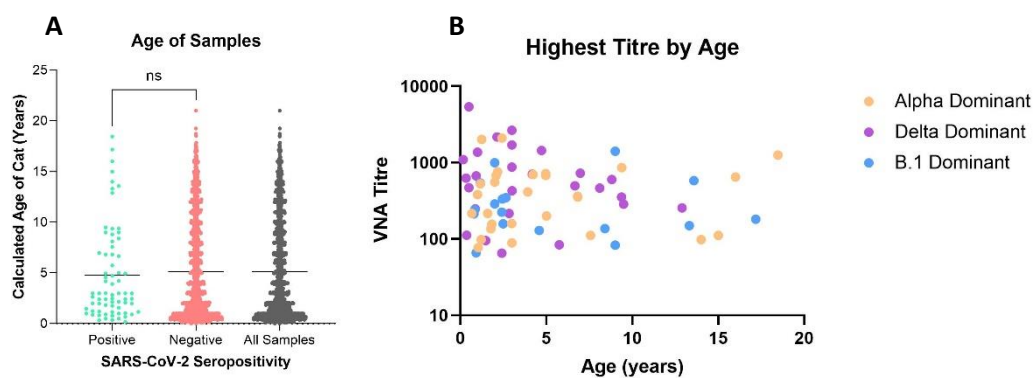

**Figure 4: Overview of age of seropositive animals**

The age distribution of positive and negative samples analyzed using a Mann-Whitney test (A). No significant difference was seen between the average age of positive and negative samples. Each sample's highest titre plotted against the age of the cat sampled (B). No correlation was observed.

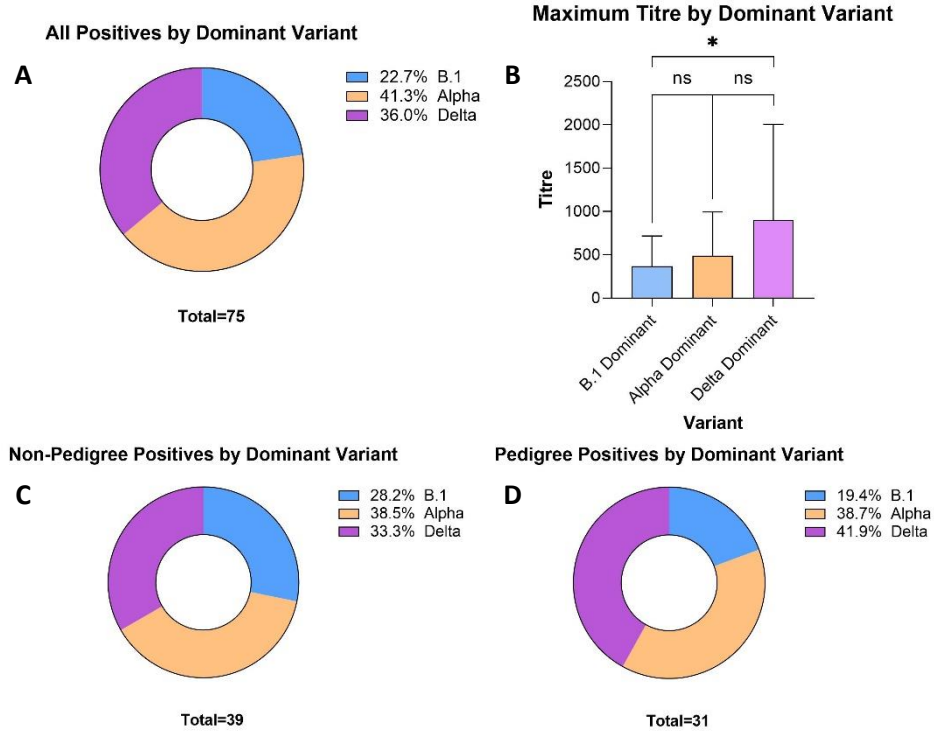

317

**Figure 5: Seropositive cases shown by dominant variant**

Seropositive samples categorized by their dominant variant (A). The average titre produced by each serum sample against its dominant variant (B). Normality of sample distribution was assessed using a Shapiro-wilk test and significance was assessed using a Mann-Whitney test (ns= not significant, \* =  $p < 0.05$ ). Seropositive samples categorized by breed – either non-pedigree (C) or pedigree (D).

Seropositive cats of unknown breed were not included in this figure.

318

319

320

321

322

323

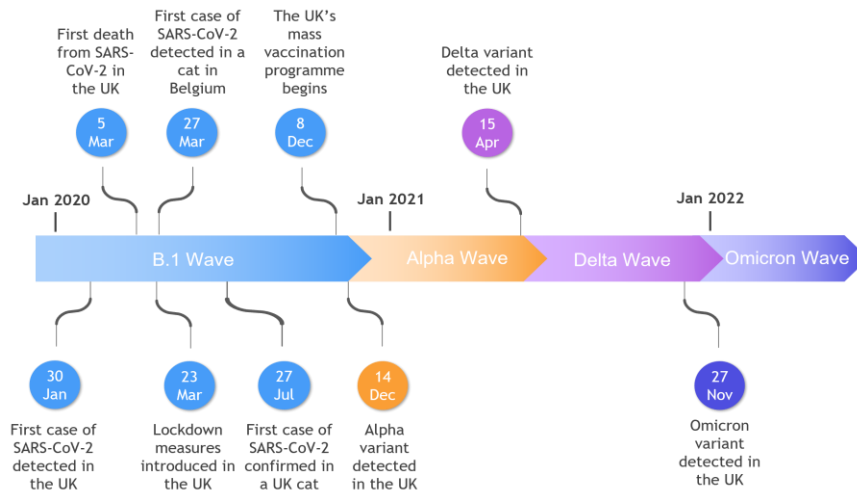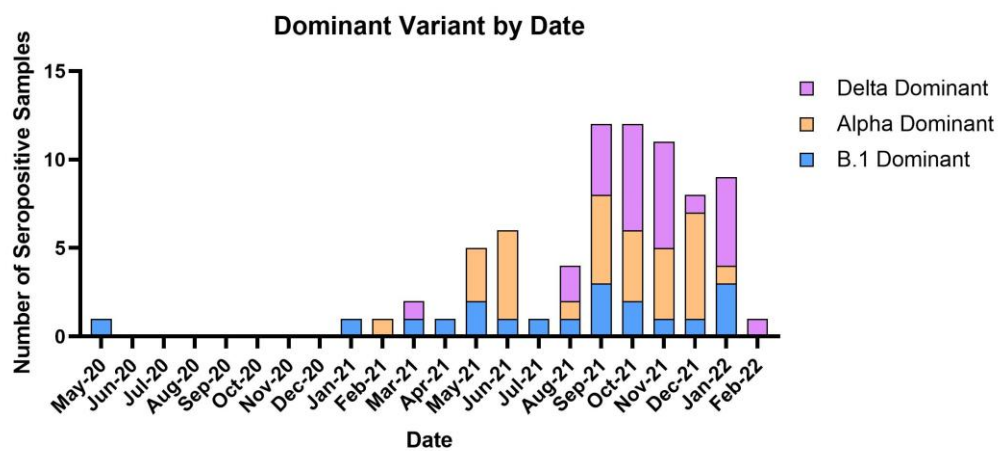

*Figure 6: Overview of dominant variant of seropositive samples by date*

Seropositive samples categorized by dominant variant and plotted by month. Results are displayed as a percentage of all seropositive samples from that period. Also shown is a timeline of key events of the COVID-19 pandemic in the UK and emergence of major variants into the UK human population.

324

325

326

327

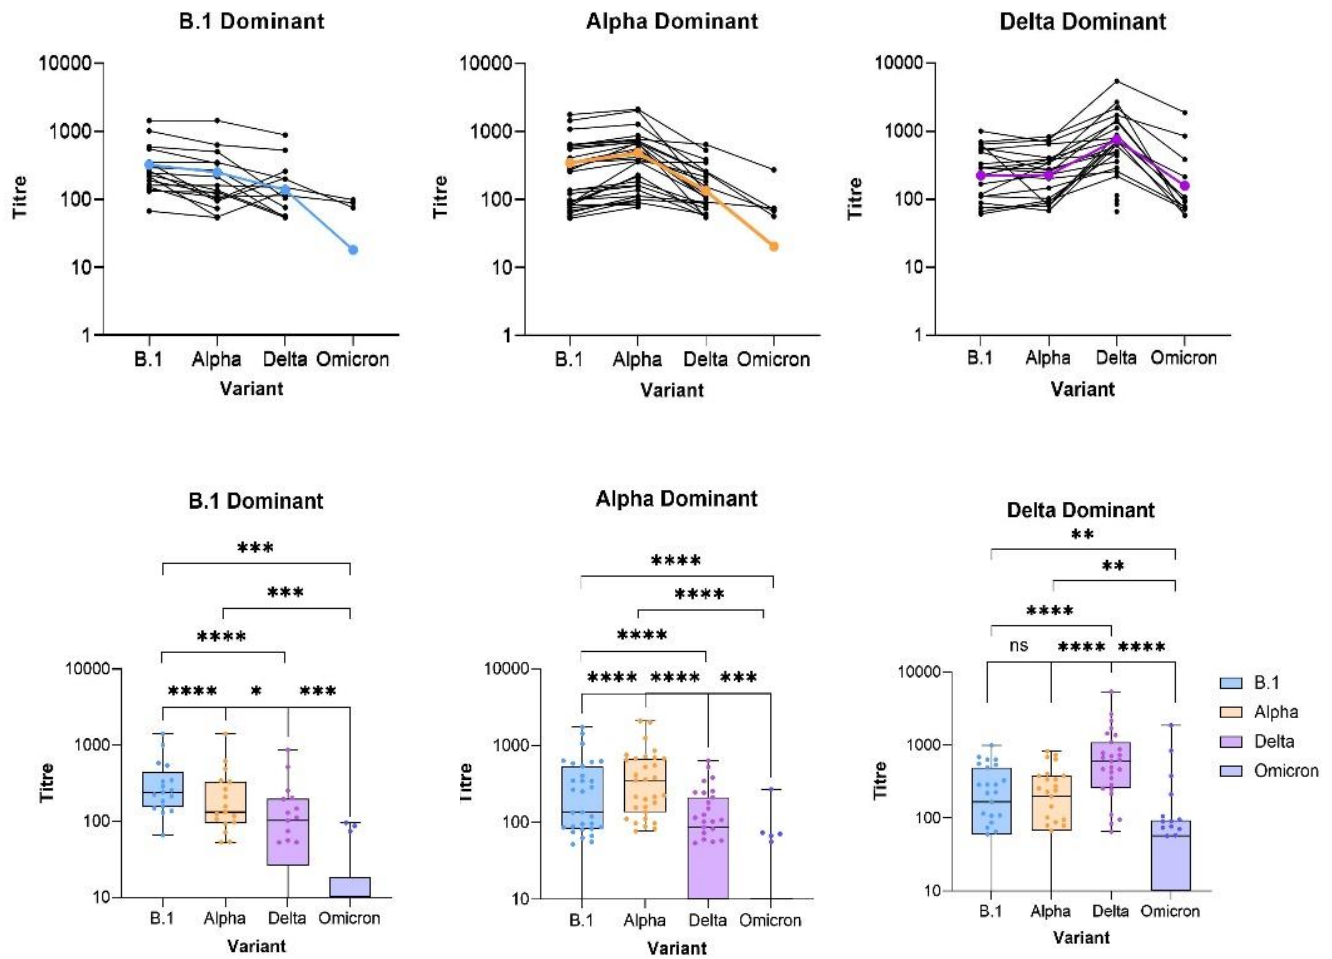

**Figure 7: Virus neutralisation titres of seropositive samples grouped by dominant variant**

Neutralizing titers for samples classified by dominant variant, showing the three distinct patterns of immunity (ns= not significantly different, asterisks indicate significant differences as follows: \*=  $p < 0.05$ , \*\* =  $p < 0.01$ , \*\*\* =  $p < 0.001$ , \*\*\*\* =  $p < 0.0001$ , Wilcoxon test). Mean patterns of cross-neutralization for each dominant group are displayed in bold color in line graphs

328

329

330

331

332

| Sample | Days Between Sampling | Titres |       |       | Percentage change per day |       |       |
|--------|-----------------------|--------|-------|-------|---------------------------|-------|-------|
|        |                       | B.1    | Alpha | Delta | B.1                       | Alpha | Delta |
| Cat F  | 12                    | 490    | 257   | 601   | 5.90%                     | 0.90% | 4.10% |
|        |                       | 146    | 229   | 303   |                           |       |       |
| Cat G  | 175                   | 586    | 677   | 243   | 0.40%                     | 0.40% | 0.40% |
|        |                       | 134    | 170   | 58    |                           |       |       |
| Cat H  | 94                    | 687    | 825   | 2165  | 0.30%                     | 0.20% | 0.70% |
|        |                       | 474    | 678   | 685   |                           |       |       |
| Cat J  | 175                   | 627    | 719   | 247   | 0.30%                     | 0.40% | 0.40% |
|        |                       | 318    | 241   | 79    |                           |       |       |
| Cat L  | 23                    | 109    | 102   | 468   | -7.20%                    | 1.40% | 1.60% |
|        |                       | 289    | 70    | 301   |                           |       |       |

*Table 1: Overview of longitudinal samples*

Five animals had two samples submitted to the study taken  $\geq 12$  days apart. The earliest sample was used in the overall analysis, however, newer samples were also tested and the titres against each variant are shown for each sample with the earlier sample on top and later below. Titres are colour-coded by size. Percentage change in titre per day is also shown.

333

334

335

336

337

338

339

340

341

342

343

344

345

346

347 Supplementary Data

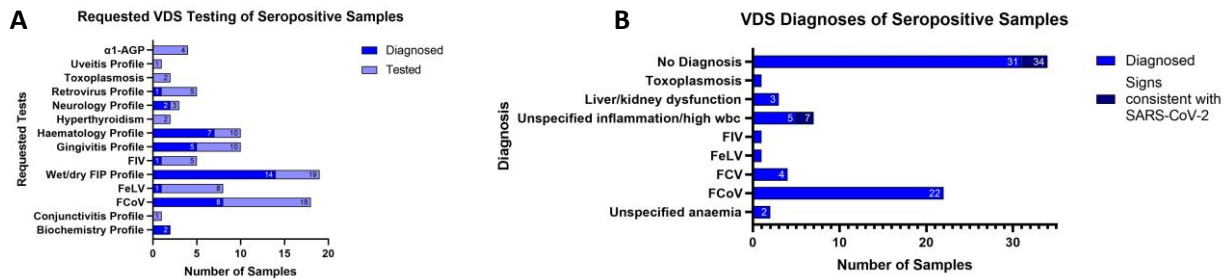

| Profile                       | Tests included                                                                                                            |
|-------------------------------|---------------------------------------------------------------------------------------------------------------------------|
| <b>Wet/dry FIP Profile</b>    | FCoV antibodies, haematology (dry), Albumin: Globulin ratio (dry), fluid analysis (wet), α1-AGP                           |
| <b>Gingivitis Profile</b>     | Respiratory virus isolation (herpesvirus & calicivirus), FeLV, FIV                                                        |
| <b>Haematology Profile</b>    | Including smear examination, RBC, Haematocrit, Haemoglobin, MCV, MCH, MCHC, RDW, WBC & Differential count, Platelet count |
| <b>Neurology Profile</b>      | FeLV, FIV, FCoV, Toxoplasma                                                                                               |
| <b>Biochemistry Profile</b>   | Total Protein, Albumin, Globulin, ALP, ALT, Urea, Creatinine                                                              |
| <b>Hyperthyroidism</b>        | Total Protein, Albumin, Globulin, ALP, ALT, Urea, Creatinine, T4, Phosphate                                               |
| <b>Retrovirus Profile</b>     | FeLV antigen, FIV antibodies                                                                                              |
| <b>Uveitis Profile</b>        | FeLV, FIV, FCoV, Toxoplasma                                                                                               |
| <b>α1-AGP</b>                 | α1-AGP                                                                                                                    |
| <b>Conjunctivitis Profile</b> | FHV PCR, C. felis PCR, Mycoplasma felis culture & PCR                                                                     |
| <b>FCoV</b>                   | FCoV antibody (immunofluorescence) or PCR                                                                                 |
| <b>FeLV</b>                   | Antigen (ELISA) and virus isolation or rt-PCR                                                                             |
| <b>FIV</b>                    | Antibody                                                                                                                  |
| <b>Toxoplasmosis</b>          | IFA test                                                                                                                  |

Figure 8: Overview of VDS tests conducted on dataset

All samples tested are residuals which had been submitted to the University of Glasgow’s Veterinary Diagnostic Service (VDS) for various tests. The tests requested for seropositive samples and whether these tests resulted in a diagnosis (A). The diagnoses of seropositive samples along with those exhibiting clinical signs consistent with human SARS-CoV-2 infections (Respiratory and GI symptoms and pyrexia) (B). The specific tests included in testing packages offered by the VDS (C).

348

349

350

## 351 References

- 352 1. Garigliany M, Van Laere AS, Clercx C, Giet D, Escriou N, Huon C, et al. SARS-CoV-2 Natural  
353 Transmission from Human to Cat, Belgium, March 2020. *Emerg Infect Dis.* 2020 Dec;26(12):3069-71.
- 354 2. Barrs VR, Peiris M, Tam KWS, Law PYT, Brackman CJ, To EMW, et al. SARS-CoV-2 in  
355 Quarantined Domestic Cats from COVID-19 Households or Close Contacts, Hong Kong, China. *Emerg*  
356 *Infect Dis.* 2020 Dec;26(12):3071-4.
- 357 3. Stout AE, André NM, Jaimes JA, Millet JK, Whittaker GR. Coronaviruses in cats and other  
358 companion animals: Where does SARS-CoV-2/COVID-19 fit? *Vet Microbiol.* 2020 Aug;247:108777.
- 359 4. McAloose D, Laverack M, Wang L, Killian ML, Caserta LC, Yuan F, et al. From People to  
360 Panthera: Natural SARS-CoV-2 Infection in Tigers and Lions at the Bronx Zoo. *mBio.* 2020 Oct 13;11(5).
- 361 5. Krafft E, Denolly S, Boson B, Angelloz-Pessey S, Levaltier S, Nesi N, et al. Report of One-Year  
362 Prospective Surveillance of SARS-CoV-2 in Dogs and Cats in France with Various Exposure Risks:  
363 Confirmation of a Low Prevalence of Shedding, Detection and Complete Sequencing of an Alpha  
364 Variant in a Cat. *Viruses.* 2021 Sep 3;13(9).
- 365 6. Hosie MJ, Epifano I, Herder V, Orton RJ, Stevenson A, Johnson N, et al. Detection of SARS-CoV-  
366 2 in respiratory samples from cats in the UK associated with human-to-cat transmission. *Vet Rec.*  
367 2021 Apr;188(8):e247.
- 368 7. Smith SL, Anderson ER, Cansado-Utrilla C, Prince T, Farrell S, Brant B, et al. SARS-CoV-2  
369 neutralising antibodies in dogs and cats in the United Kingdom. *Curr Res Virol Sci.* 2021;2:100011.
- 370 8. Fernández-Bellón H, Rodon J, Fernández-Bastit L, Almagro V, Padilla-Solé P, Lorca-Oró C, et al.  
371 Monitoring Natural SARS-CoV-2 Infection in Lions (*Panthera leo*) at the Barcelona Zoo: Viral Dynamics  
372 and Host Responses. *Viruses.* 2021 Aug 25;13(9).
- 373 9. Wu L, Chen Q, Liu K, Wang J, Han P, Zhang Y, et al. Broad host range of SARS-CoV-2 and the  
374 molecular basis for SARS-CoV-2 binding to cat ACE2. *Cell Discovery.* 2020;6:68.
- 375 10. Ma C, Gong C. ACE2 models of frequently contacted animals provide clues of their SARS-CoV-  
376 2 S protein affinity and viral susceptibility. *Journal of Medical Virology.* 2021;93(7):4469-79.
- 377 11. Kannekens-Jager MM, de Rooij MMT, de Groot Y, Biesbroeck E, de Jong MK, Pijnacker T, et al.  
378 SARS-CoV-2 infection in dogs and cats is associated with contact to COVID-19 positive household  
379 members. *Transbound Emerg Dis.* 2022 Sep 26.
- 380 12. Dias HG, Resck MEB, Caldas GC, Resck AF, da Silva NV, Dos Santos AMV, et al. Neutralizing  
381 antibodies for SARS-CoV-2 in stray animals from Rio de Janeiro, Brazil. *PLoS One.*  
382 2021;16(3):e0248578.
- 383 13. Zhang Q, Zhang H, Gao J, Huang K, Yang Y, Hui X, et al. A serological survey of SARS-CoV-2 in  
384 cat in Wuhan. *Emerg Microbes Infect.* 2020 Dec;9(1):2013-9.
- 385 14. Shi J, Wen Z, Zhong G, Yang H, Wang C, Huang B, et al. Susceptibility of ferrets, cats, dogs, and  
386 other domesticated animals to SARS-coronavirus 2. *Science.* 2020 May 29;368(6494):1016-20.
- 387 15. Bosco-Lauth AM, Hartwig AE, Porter SM, Gordy PW, Nehring M, Byas AD, et al. Pathogenesis,  
388 transmission and response to re-exposure of SARS-CoV-2 in domestic cats. *Proc Natl Acad Sci U S A.*  
389 2020;117(42):26382-8.
- 390 16. Gaudreault NN, Carossino M, Morozov I, Trujillo JD, Meekins DA, Madden DW, et al.  
391 Experimental re-infected cats do not transmit SARS-CoV-2. *Emerging Microbes & Infections.*  
392 2021;10(1):638-50.
- 393 17. Sila T, Sunghan J, Laochareonsuk W, Surasombatpattana S, Kongkamol C, Ingviya T, et al.  
394 Suspected Cat-to-Human Transmission of SARS-CoV-2, Thailand, July-September 2021. *Emerg Infect*  
395 *Dis.* 2022 Jun 6;28(7).
- 396 18. Gonzales JL, De Jong MCM, Gerhards NM, Van Der Poel WHM. The SARS-CoV-2 Reproduction  
397 Number R0 in Cats. *Viruses.* 2021;13(13).
- 398 19. Wei C, Shan KJ, Wang W, Zhang S, Huan Q, Qian W. Evidence for a mouse origin of the SARS-  
399 CoV-2 Omicron variant. *J Genet Genomics.* 2021 Dec 23.



- 400 20. Oude Munnink BB, Sikkema RS, Nieuwenhuijse DF, Molenaar RJ, Munger E, Molenkamp R, et  
401 al. Transmission of SARS-CoV-2 on mink farms between humans and mink and back to humans.  
402 *Science*. 2021 Jan 8;371(6525):172-7.
- 403 21. Oreshkova N, Molenaar RJ, Vreman S, Harders F, Oude Munnink BB, Hakze-van der Honing  
404 RW, et al. SARS-CoV-2 infection in farmed minks, the Netherlands, April and May 2020. *Euro Surveill*.  
405 2020 Jun;25(23).
- 406 22. Aart AE, Velkers FC, Fischer EAJ, Broens EM, Egberink H, Zhao S, et al. SARS-CoV-2 infection in  
407 cats and dogs in infected mink farms. *Transbound Emerg Dis*. 2022;69(5):3001-7.
- 408 23. Giraldo-Ramirez S, Rendon-Marin S, Jaimes JA, Martinez-Gutierrez M, Ruiz-Saenz J. SARS-CoV-  
409 2 Clinical Outcome in Domestic and Wild Cats: A Systematic Review. *Animals (Basel)*. 2021 Jul 9;11(7).
- 410 24. Ruiz-Arrondo I, Portillo A, Palomar AM, Santibáñez S, Santibáñez P, Cervera C, et al. Detection  
411 of SARS-CoV-2 in pets living with COVID-19 owners diagnosed during the COVID-19 lockdown in Spain:  
412 A case of an asymptomatic cat with SARS-CoV-2 in Europe. *Transbound Emerg Dis*. 2021  
413 Mar;68(2):973-6.
- 414 25. Decaro N, Balboni A, Bertolotti L, Martino PA, Mazzei M, Mira F, et al. SARS-CoV-2 Infection in  
415 Dogs and Cats: Facts and Speculations. *Front Vet Sci*. 2021;8:619207.
- 416 26. Chetboul V, Foulex P, Kartout K, Klein AM, Sailleau C, Dumarest M, et al. Myocarditis and  
417 Subclinical-Like Infection Associated With SARS-CoV-2 in Two Cats Living in the Same Household in  
418 France: A Case Report With Literature Review. *Front Vet Sci*. 2021;8:748869.
- 419 27. Ferasin L, Fritz M, Ferasin H, Becquart P, Corbet S, Ar Gouilh M, et al. Infection with SARS-  
420 CoV-2 variant B.1.1.7 detected in a group of dogs and cats with suspected myocarditis. *Vet Rec*. 2021  
421 Nov;189(9):e944.
- 422 28. Kevadiya BD, Machhi J, Herskovitz J, Oleynikov MD, Blomberg WR, Bajwa N, et al. Diagnostics  
423 for SARS-CoV-2 infections. *Nat Mater*. 2021;20(5):593-605.
- 424 29. Cui H, Zhang L. Key Components of Inflammasome and Pyroptosis Pathways Are Deficient in  
425 Canines and Felines, Possibly Affecting Their Response to SARS-CoV-2 Infection. *Front Immunol*.  
426 2020;11:592622.
- 427 30. Agency) AAPaH. SARS-CoV-2 in Animals – Case Definition, Testing  
428 and International Reporting Obligations. In: DEFRA, editor. 2 ed. UK: HM Government; 2021.
- 429 31. Barua S, Hoque M, Adekanmbi F, Kelly P, Jenkins-Moore M, Torchetti MK, et al. Antibodies to  
430 SARS-CoV-2 in dogs and cats, USA. *Emerg Microbes Infect*. 2021 Dec;10(1):1669-74.
- 431 32. Zhao S, Schuurman N, Li W, Wang C, Smit LAM, Broens EM, et al. Serologic Screening of  
432 Severe Acute Respiratory Syndrome Coronavirus 2 Infection in Cats and Dogs during First Coronavirus  
433 Disease Wave, the Netherlands. *Emerg Infect Dis*. 2021;27(5):1362-70.
- 434 33. Fernández-Bastit L, Marfil S, Pradenas E, Valle R, Roca N, Rodon J, et al. Severe acute  
435 respiratory syndrome coronavirus 2 (SARS-CoV-2) infection and humoral responses against different  
436 variants of concern in domestic pet animals and stray cats from North-Eastern Spain. *Transbound*  
437 *Emerg Dis*. 2022 Sep 27.
- 438 34. Pérez-Alós L, Armenteros JJA, Madsen JR, Hansen CB, Jarlhelt I, Hamm SR, et al. Modeling of  
439 waning immunity after SARS-CoV-2 vaccination and influencing factors. *Nat Commun*. 2022 Mar  
440 28;13(1):1614.
- 441 35. Ahmed S, Mehta P, Paul A, Anu S, Cherian S, Shenoy V, et al. Postvaccination antibody titres  
442 predict protection against COVID-19 in patients with autoimmune diseases: survival analysis in a  
443 prospective cohort. *Annals of the Rheumatic Diseases*. 2022;81:868-74.
- 444 36. Lu X, Zhang L, Du H, Zhang J, Li YY, Qu J, et al. SARS-CoV-2 Infection in Children. *N Engl J Med*.  
445 2020;382(17):1663-5.
- 446 37. Dowell AC, Butler MS, Jinks E, Tut G, Lancaster T, Sylla P, et al. Children develop robust and  
447 sustained cross-reactive spike-specific immune responses to SARS-CoV-2 infection. *Nat Immunol*.  
448 2022 Jan;23(1):40-9.
- 449 38. Lopez Bernal J, Andrews N, Gower C, Gallagher E, Simmons R, Thelwall S, et al. Effectiveness  
450 of Covid-19 Vaccines against the B.1.617.2 (Delta) Variant. *N Engl J Med*. 2021;358(7):585-94.

- 451 39. Wall EC, Wu M, Harvey R, Kelly G, Warchal S, Sawyer C, et al. Neutralising antibody activity  
452 against SARS-CoV-2 VOCs B.1.617.2 and B.1.351 by BNT162b2 vaccination. *Lancet*. 2021 Jun  
453 19;397(10292):2331-3.
- 454 40. Davis C, Logan N, Tyson G, Orton R, Harvey WT, Perkins JS, et al. Reduced neutralisation of the  
455 Delta (B.1.617.2) SARS-CoV-2 variant of concern following vaccination. *PLoS Pathog*. 2021  
456 Dec;17(12):e1010022.
- 457 41. Peng Q, Zhou R, Wang Y, Zhao M, Liu N, Li S, et al. Waning immune responses against SARS-  
458 CoV-2 variants of concern among vaccinees in Hong Kong. *EBioMedicine*. 2022 Mar;77:103904.
- 459 42. Willett BJ, Grove J, Maclean OA, Wilkie C, Logan N, Lorenzo GD, et al. The hyper-transmissible  
460 SARS-CoV-2 Omicron variant exhibits significant antigenic change, vaccine escape and a switch in cell  
461 entry mechanism. *Nat Microbiol*. 2022;7:1161-79.
- 462 43. Altarawneh HN, Chemaitelly H, Hasan MR, Ayoub HH, Qassim S, Almkudat S, et al. Protection  
463 against the Omicron Variant from Previous SARS-CoV-2 Infection. *N Engl J Med*. 2022;386(13):1288-  
464 90.
- 465 44. Kramer JW, Davis WC, Prieur DJ. The Chediak-Higashi syndrome of cats. *Lab Invest*. 1977  
466 May;36(5):554-62.
- 467 45. Addie DD. Feline infectious peritonitis: answers to frequently asked questions concerning FIP  
468 and coronavirus. *Veterinary Nursing Journal*. 2019;34(8):201-6.
- 469 46. Zufferey R, Nagy D, Mandel RJ, Naldini L, Trono D. Multiply attenuated lentiviral vector  
470 achieves efficient gene delivery in vivo. *Nat Biotechnol*. 1997 Sep;15(9):871-5.
- 471 47. Zufferey R, Dull T, Mandel RJ, Bukovsky A, Quiroz D, Naldini L, et al. Self-inactivating lentivirus  
472 vector for safe and efficient in vivo gene delivery. *J Virol*. 1998 Dec;72(12):9873-80.
- 473 48. Hughes EC, Amat JAR, Haney J, Parr YA, Logan N, Palmateer N, et al. Severe Acute Respiratory  
474 Syndrome Coronavirus 2 Serosurveillance in a Patient Population Reveals Differences in Virus  
475 Exposure and Antibody-Mediated Immunity According to Host Demography and Healthcare Setting. *J*  
476 *Infect Dis*. 2021 Mar 29;223(6):971-80.
- 477 49. Bienzle D, Rousseau J, Marom D, Macnicol J, Jacobson L, Sparling S, et al. Risk Factors for  
478 SARS-CoV-2 Infection and Illness in Cats and Dogs. *Emerg Infect Dis*. 2022;28(6):1154-62.
- 479 50. Udom K, Jairak W, Chamsai E, Charoenkul K, Boonyapisitsopa S, Bunpapong N, et al.  
480 Serological survey of antibodies against SARS-CoV-2 in dogs and cats, Thailand. *Transbound Emerg*  
481 *Dis*. 2022;69(4):2140-7.
- 482 51. Mahase E. Delta variant: What is happening with transmission, hospital admissions, and  
483 restrictions? *bmj*. 2021;373.
- 484 52. Torjesen I. Covid-19: Omicron may be more transmissible than other variants and partly  
485 resistant to existing vaccines, scientists fear. *Bmj*. 2021;375:2943.
- 486 53. Suzuki R, Yamasoba D, Kimura I, Wang L, Kishimoto M, Ito J, et al. Attenuated fusogenicity and  
487 pathogenicity of SARS-CoV-2 Omicron variant. *Nature*. 2022 Mar;603(7902):700-5.
- 488 54. Calvet GA, Pereira SA, Ogrzewalska M, Pauvolid-Corrêa A, Resende PC, Tassinari WDS, et al.  
489 Investigation of SARS-CoV-2 infection in dogs and cats of humans diagnosed with COVID-19 in Rio de  
490 Janeiro, Brazil. *PLoS ONE*. 2021;16(4).
- 491 55. Oliveira A, Pereira MA, Mateus TL, Mesquita JR, Vala H. Seroprevalence of SARS-CoV-2 in  
492 Client-Owned Cats from Portugal. *Vet Sci*. 2022 Jul 16;9(7).
- 493 56. Barroso-Arévalo S, Barneto A, Ramos ÁM, Rivera B, Sánchez R, Sánchez-Morales L, et al.  
494 Large-scale study on virological and serological prevalence of SARS-CoV-2 in cats and dogs in Spain.  
495 *Transbound Emerg Dis*. 2022;69(4):759-74.
- 496 57. Marot S, Malet I, Leducq V, Zafilaza K, Sterlin D, Planas D, et al. Rapid decline of neutralizing  
497 antibodies against SARS-CoV-2 among infected healthcare workers. *Nat Commun*. 2021 Feb  
498 8;12(1):844.
- 499 58. Michlmayr D, Hansen CH, Gubbels SM, Valentiner-Branth P, Bager P, Obel N, et al. Observed  
500 protection against SARS-CoV-2 reinfection following a primary infection: A Danish cohort study among  
501 unvaccinated using two years of nationwide PCR-test data. *Lancet Reg Health Eur*. 2022.

- 502 59. Goldberg Y, Mandel M, Bar-On YM, Bodenheimer O, Freedman LS, Ash N, et al. Protection  
503 and Waning of Natural and Hybrid Immunity to SARS-CoV-2. *N Engl J Med*. 2022;386:2201-12.
- 504 60. Russell MW, Moldoveanu Z, Ogra PL, Mestecky J. Mucosal Immunity in COVID-19: A  
505 Neglected but Critical Aspect of SARS-CoV-2 Infection. *Front Immunol*. 2020;11:611337.
- 506 61. Lapuente D, Fuchs J, Willar J, Vieira Antão A, Eberlein V, Uhlig N, et al. Protective mucosal  
507 immunity against SARS-CoV-2 after heterologous systemic prime-mucosal boost immunization. *Nat*  
508 *Commun*. 2021 Nov 26;12(1):6871.
- 509 62. Manali M, Bissett LA, Amat JAR, Logan N, Scott S, Hughes EC, et al. SARS-CoV-2 evolution and  
510 patient immunological history shape the breadth and potency of antibody-mediated immunity. *J*  
511 *Infect Dis*. 2022;332.
- 512 63. Planas D, Veyer D, Baidaliuk A, Staropoli I, Guivel-Benhassine F, Rajah MM, et al. Reduced  
513 sensitivity of SARS-CoV-2 variant Delta to antibody neutralization. *Nature*. 2021;596:276-80.
- 514 64. Wilhelm A, Widera M, Grikscheit K, Toptan T, Schenk B, Pallas C, et al. Limited neutralisation  
515 of the SARS-CoV-2 Omicron subvariants BA.1 and BA.2 by convalescent and vaccine serum and  
516 monoclonal antibodies. *EBioMedicine*. 2022;82.
- 517 65. Wang Y, Liu C, Zhang C, Hong Q, Xu S, Li Z, et al. Structural basis for SARS-CoV-2 Delta variant  
518 recognition of ACE2 receptor and broadly neutralizing antibodies. *Nat Commun*. 2022 Feb  
519 15;13(1):871.
- 520 66. Kumar S, Thambiraja TS, Karuppanan K, Subramaniam G. Omicron and Delta variant of SARS-  
521 CoV-2: A comparative computational study of spike protein. *J Med Virol*. 2022;94(4):1641-9.
- 522 67. Wei J, Stoesser N, Matthews PC, Ayoubkhani D, Studley R, Bell I, et al. Antibody responses to  
523 SARS-CoV-2 vaccines in 45,965 adults from the general population of the United Kingdom. *Nat*  
524 *Microbiol*. 2021;6(9):1140-9.
- 525 68. Foreman-Worsley R, Finka LR, Ward SJ, Farnworth MJ. Indoors or Outdoors? An International  
526 Exploration of Owner Demographics and Decision Making Associated with Lifestyle of Pet Cats.  
527 *Animals*. 2021;11(2):253.
- 528 69. Plitman L, Černá P, Farnworth MJ, Packer RMA, Gunn-Moore DA. Motivation of Owners to  
529 Purchase Pedigree Cats, with Specific Focus on the Acquisition of Brachycephalic Cats. *Animals (Basel)*.  
530 2019 Jun 27;9(7).
- 531 70. Leroy EM, Ar Guilh M, Brugère-Picoux J. The risk of SARS-CoV-2 transmission to pets and  
532 other wild and domestic animals strongly mandates a one-health strategy to control the COVID-19  
533 pandemic. *One Health*. 2020 Dec;10:100133.

534
